# Supplementary material
Source: Frontiers journal article supplement (https://www.frontiersin.org/articles/500284)
Supplement: Data_Sheet_1.DOCX [file Data_Sheet_1.DOCX]

Supplementary Material

|  |
| --- |
| (a) (b) |

**Supplementary Figure 1.** Plan view, typical floor and elevation view of the effective model of the (a) LA3 and (b) LA9 model buildings.
